# Supplementary material
Source: PubMed Central journal article supplement (PMC6421623)

# Supplemental Figure 1

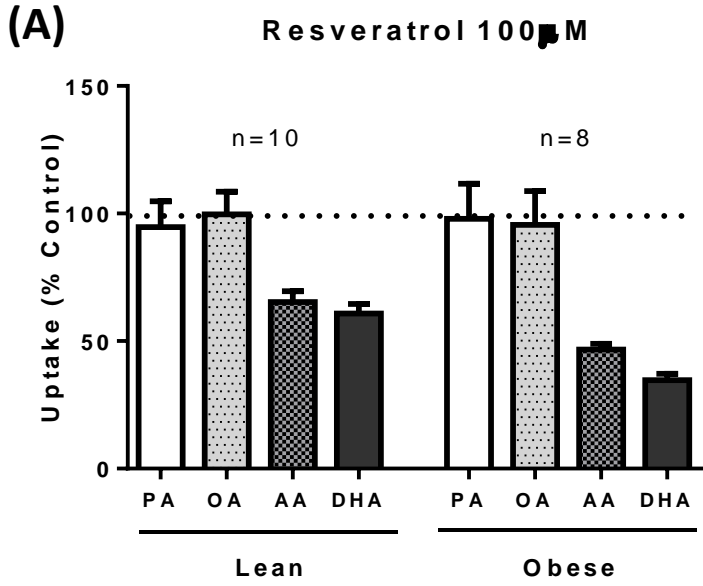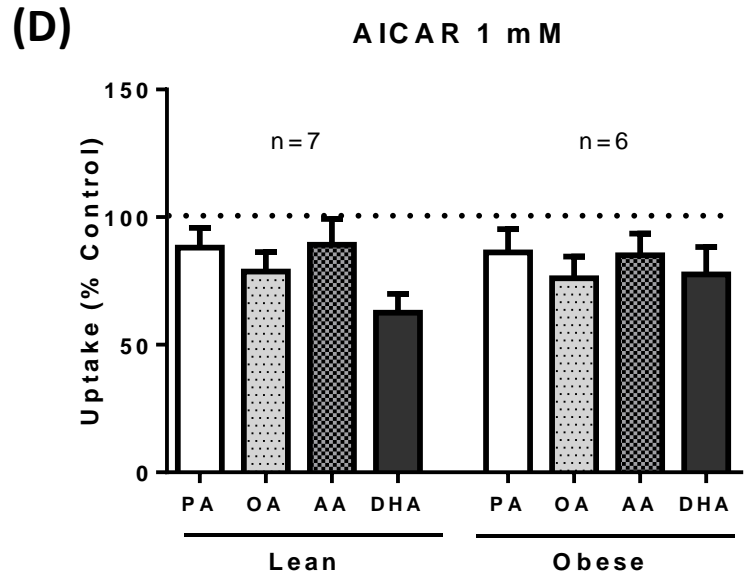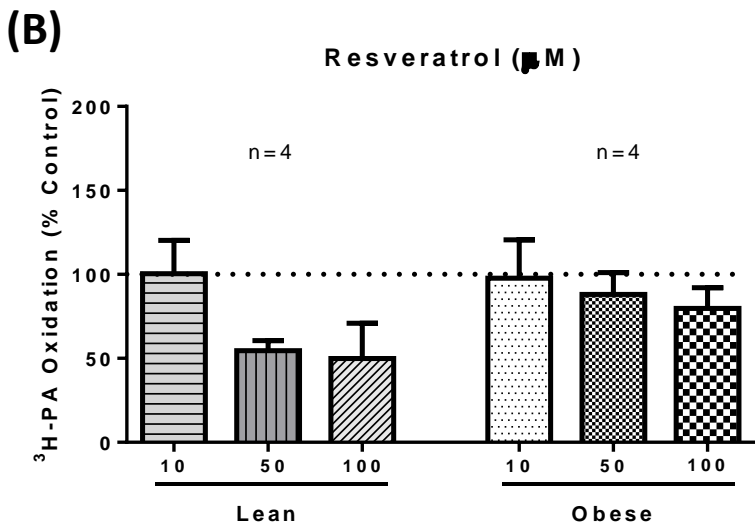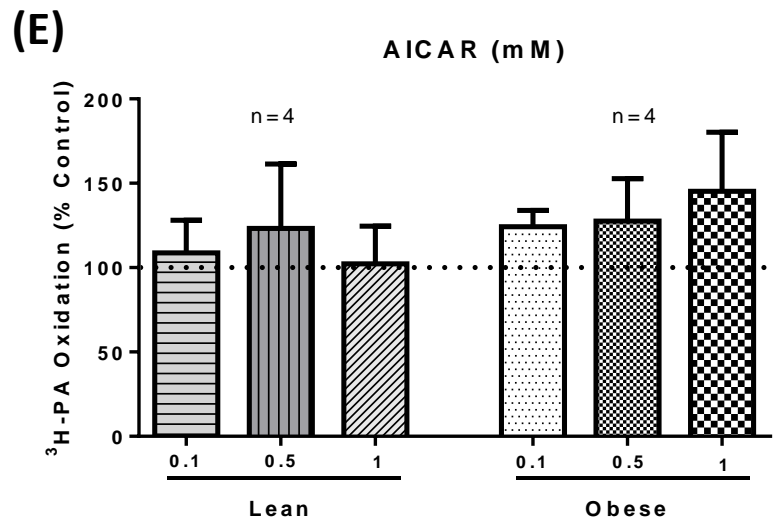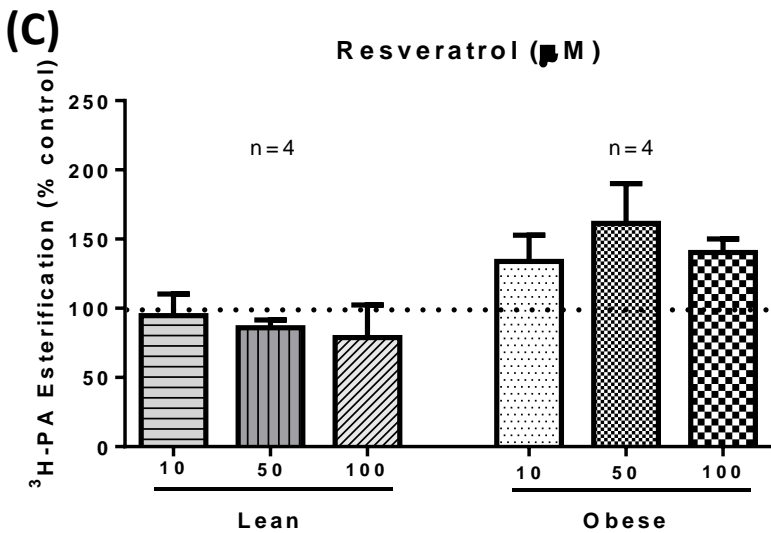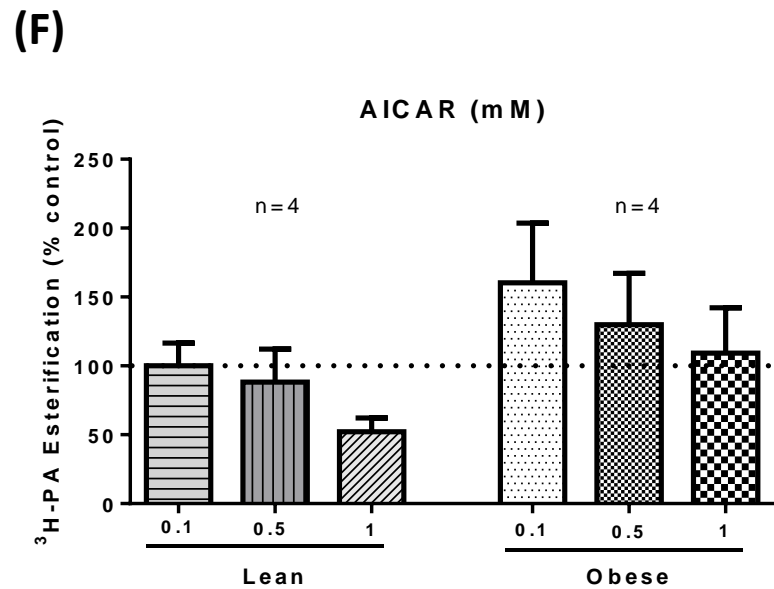

# Supplemental Figure 2

(A)

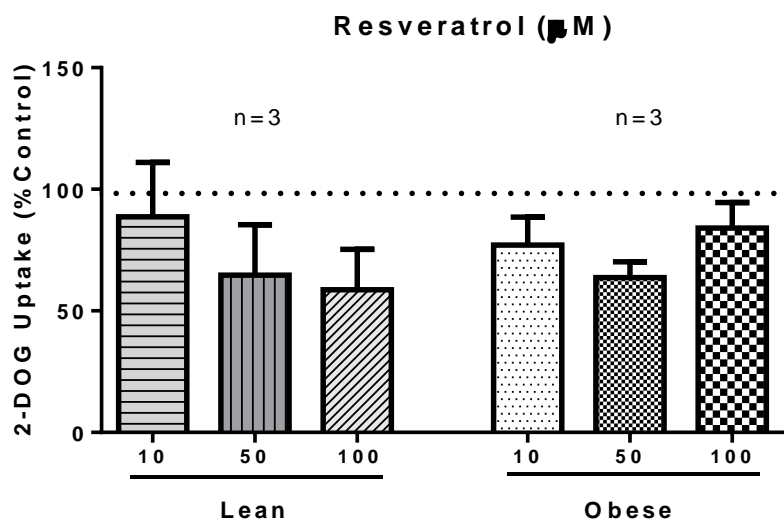

(C)

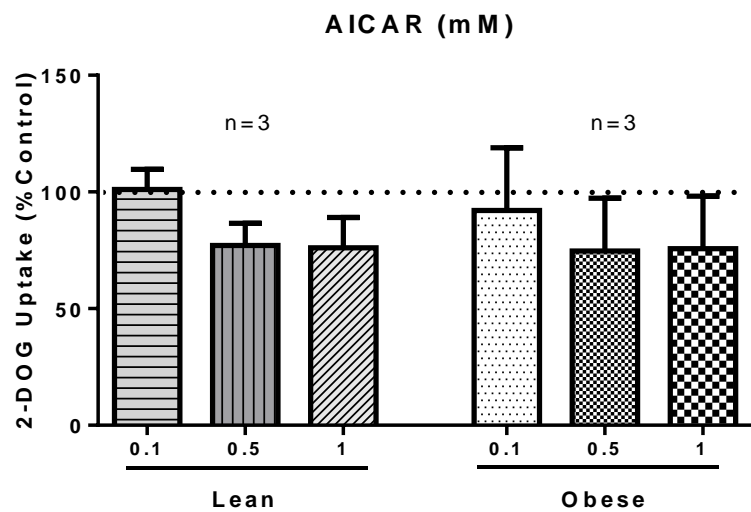

(B)

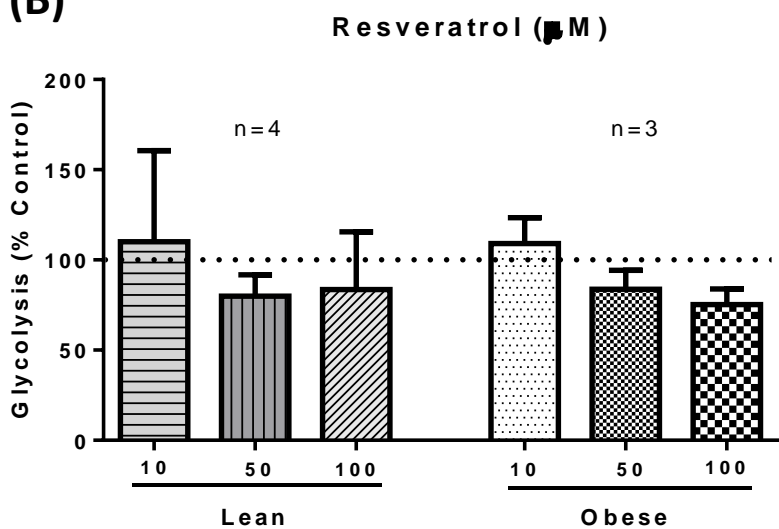

(D)

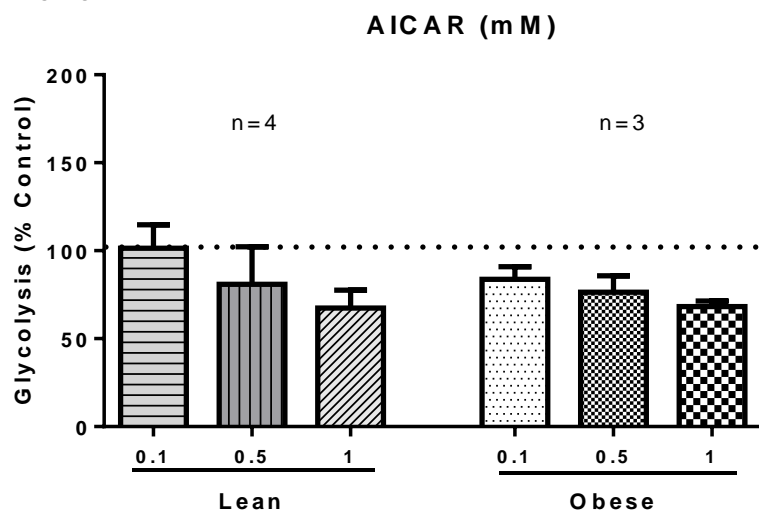

Supplement: 776803_Supplemental_Figures.pdf [file 776803_Supplemental_Figures.pdf]
